# Supplementary material for: Low-cost optical manipulation using hanging droplets of PDMS
Source: Royal Society of Chemistry journal article supplement (doi:10.1039/c5ra11431d), 2015-01-01
Supplement: c5ra11431d1.pdf [file c5ra11431d1.pdf]

### Total Cost Breakdown

In the interests of full disclosure we have provided a complete breakdown of the estimated cost of the system, neglecting the laser. An example price of each component is provided below, along with the quantity of the product required for the fabrication of a lens. Two prices for toluene have been provided as the cost per lens drops significantly when bulk-buying discounts are exploited (i.e. best case) compared with buying the minimum possible amount from Sigma Aldrich (i.e. worst case). Many of these components, however, are very common to research and teaching laboratories and could be found or borrowed.

| Component                                                                   | Quantity Bought                                                                                   | Unit | Cost (£) | Quantity Used | Unit | Cost per use (£) |
|-----------------------------------------------------------------------------|---------------------------------------------------------------------------------------------------|------|----------|---------------|------|------------------|
| Sudan II dye                                                                | 25                                                                                                | g    | 22       | 0.00056       | g    | 0.0005           |
| PDMS                                                                        | 1.1                                                                                               | kg   | 402      | 0.000086      | kg   | 0.03             |
| Toluene worst case                                                          | 100                                                                                               | ml   | 19.60    | 1             | ml   | 0.20             |
| Toluene best case                                                           | 8000                                                                                              | ml   | 158.50   | 1             | ml   | 0.02             |
| Coverslip                                                                   | 1000                                                                                              |      | 31.90    | 1             |      | 0.03             |
| Following components can be found in the lab/house and supplied by end user |                                                                                                   |      |          |               |      |                  |
| Smartphone                                                                  | Supplied by end user                                                                              |      |          |               |      |                  |
| Foam Packaging                                                              | Found in packaging. Alternatively, it can be bought for                                           |      |          |               |      | 0.02             |
| Illumination                                                                | Any old torch, bike lamp, etc can be supplied by end user. Just needs to be bright enough to see. |      |          |               |      |                  |
| Tin foil                                                                    | Supplied by end user                                                                              |      |          |               |      |                  |
| 100W bulb                                                                   | Supplied by end user                                                                              |      |          |               |      |                  |
|                                                                             | Price per trapping lens                                                                           |      |          |               |      | 0.06             |
|                                                                             | Price per imaging lens worst case                                                                 |      |          |               |      | 0.26             |
|                                                                             | Price per imaging lens best case                                                                  |      |          |               |      | 0.08             |
| Additional optics to form the trapping system                               |                                                                                                   |      |          |               |      |                  |
| 50:50 beamsplitter from Thorlabs                                            |                                                                                                   |      |          |               |      | 23.08            |
| Total cost best case (found packaging)                                      |                                                                                                   |      |          |               |      | 23.23            |
| Total cost best case (bought packaging)                                     |                                                                                                   |      |          |               |      | 23.24            |
| Total cost worst case (bought packaging)                                    |                                                                                                   |      |          |               |      | 23.42            |
